# Supplementary material for: Surface environment complication makes Ag29 nanoclusters more robust and leads to their unique packing in the supracrystal lattice
Source: Royal Society of Chemistry journal article supplement (doi:10.1039/d1sc06002c), 2022-01-01
Supplement: d1sc06002c1.pdf [file d1sc06002c1.pdf]

## ***Supporting Information***

### **Surface environment complication makes Ag<sub>29</sub> nanoclusters more robust and leads to their unique packing in the supracrystal lattice**

Chao Xu,<sup>#</sup> Qianqin Yuan,<sup>#</sup> Xiao Wei, Hao Li, Honglei Shen, Xi Kang,<sup>\*</sup> Manzhou Zhu<sup>\*</sup>

Department of Chemistry and Centre for Atomic Engineering of Advanced Materials, Key Laboratory of Structure and Functional Regulation of Hybrid Materials of Ministry of Education, Institutes of Physical Science and Information Technology and Anhui Province Key Laboratory of Chemistry for Inorganic/Organic Hybrid Functionalized Materials, Anhui University, Hefei, Anhui 230601, China.

<sup>#</sup>C.X. and Q.Y. contributed equally to this work.

<sup>\*</sup>E-mails of corresponding authors: kangxi\_chem@ahu.edu.cn (X.K.); z mz@ahu.edu.cn (M.Z.).

Notes: The authors declare no competing financial interest.

*This Supporting Information includes:*

Figures S1-S12

Tables S1-S2

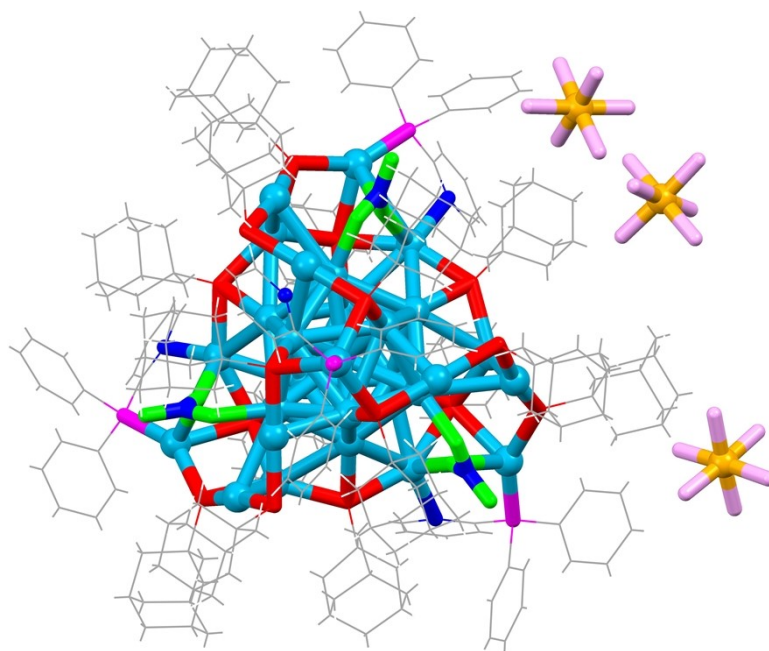

**Fig. S1** The overall structure of the  $[Ag_{29}(S-Adm)_{15}(NO_3)_3(PPh_2py)_4](SbF_6)_3$  nanocluster. Color legends: light blue sphere, Ag; red sphere, S; magenta sphere, P; blue sphere, N; green sphere, O; orange sphere, Sb; pink sphere, F; grey sphere, C; white sphere, H.

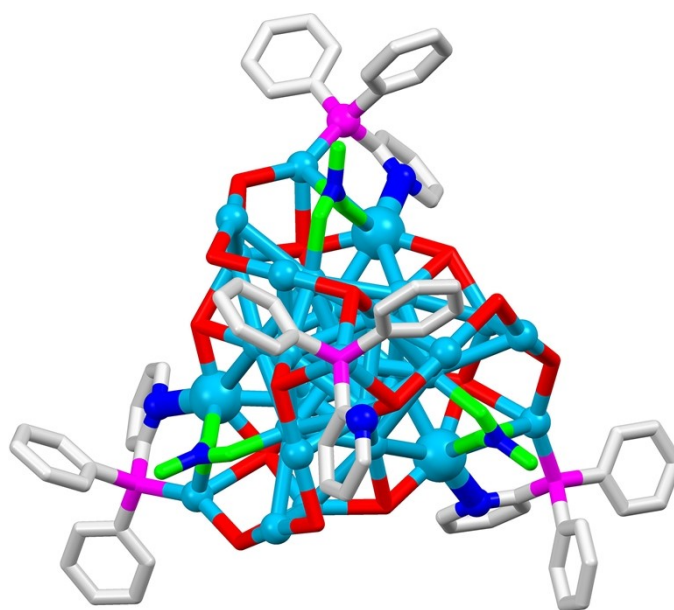

**Fig. S2** Binding modes of the four  $PPh_2py$  and three  $NO_3$  ligands on the nanocluster surface. Three  $PPh_2py$  ligands were anchored onto the nanocluster surface via Ag-P and Ag-N interactions, while the remaining  $PPh_2py$  ligand was anchored onto the nanocluster surface via only Ag-P interaction. The  $NO_3$  ligand was anchored onto the nanocluster surface via Ag-O interactions. Color legends: light blue sphere, Ag; red sphere, S; magenta sphere, P; blue sphere, N; green sphere, O; grey sphere, C. For clarity, all H atoms and several C atoms are omitted.

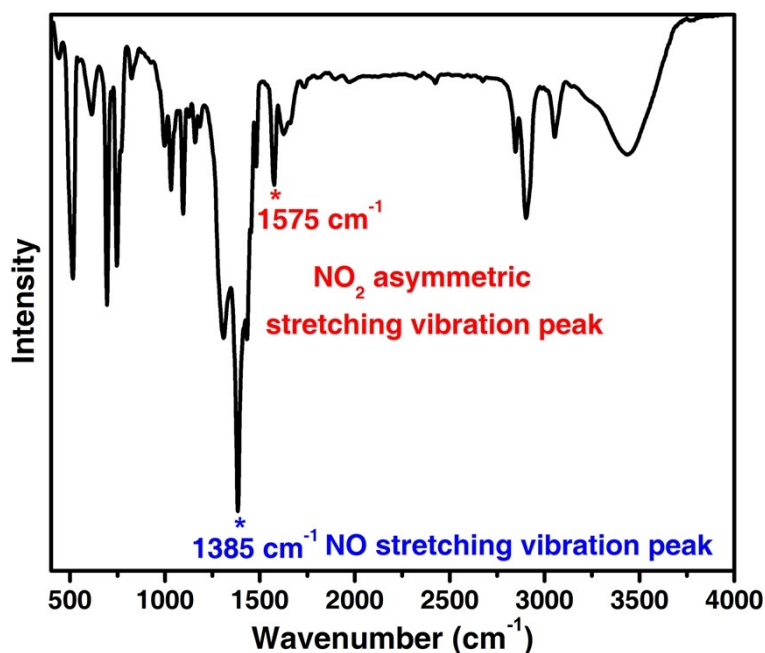

**Fig. S3** IR result of the  $\text{Ag}_{29}\text{-PPh}_2\text{py}$  nanocluster. Two IR signals were observed, corresponding to NO stretching vibration peak ( $1385\text{ cm}^{-1}$ , highlighted in blue) and  $\text{NO}_2$  asymmetric stretching vibration peak ( $1575\text{ cm}^{-1}$ , highlighted in red), which demonstrated the presence of  $\text{NO}_3$  ligands on the nanocluster surface.

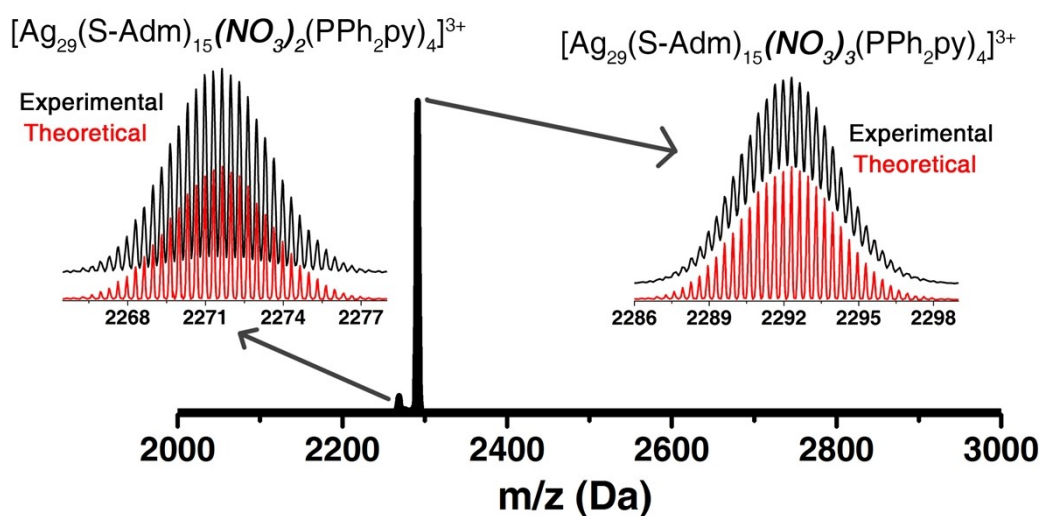

**Fig. S4** ESI-MS result of the  $\text{Ag}_{29}\text{-PPh}_2\text{py}$  nanocluster in a positive mode in a mass range from 2000 to 3000 Da. Two mass signals were observed, corresponding to  $[\text{Ag}_{29}(\text{S-Adm})_{15}(\text{NO}_3)_3(\text{PPh}_2\text{py})_4]^{3+}$  and  $[\text{Ag}_{29}(\text{S-Adm})_{15}(\text{NO}_3)_2(\text{PPh}_2\text{py})_4]^{3+}$ , respectively.

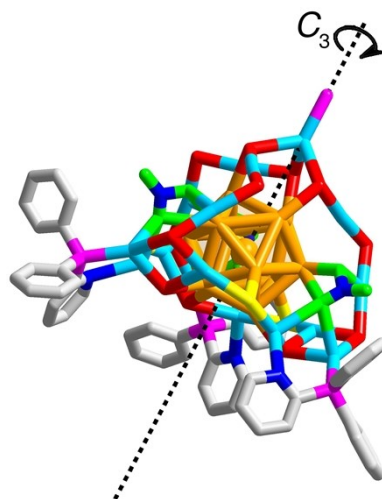

**Fig. S5** The  $C_3$  axis of symmetry of the  $\text{Ag}_{29}(\text{S-Adm})_{15}(\text{NO}_3)_3(\text{PPh}_2\text{py})_4$ , which passed through the vertex P and the innermost Ag atoms.

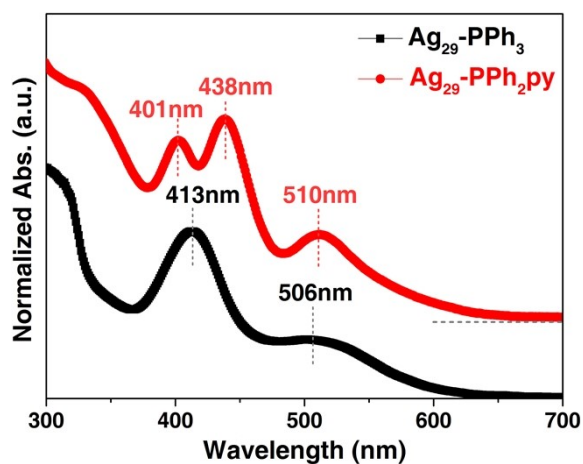

**Fig. S6** Comparison of UV-vis spectra between  $\text{Ag}_{29}\text{-PPh}_3$  (black line) and  $\text{Ag}_{29}\text{-PPh}_2\text{py}$  (red line).

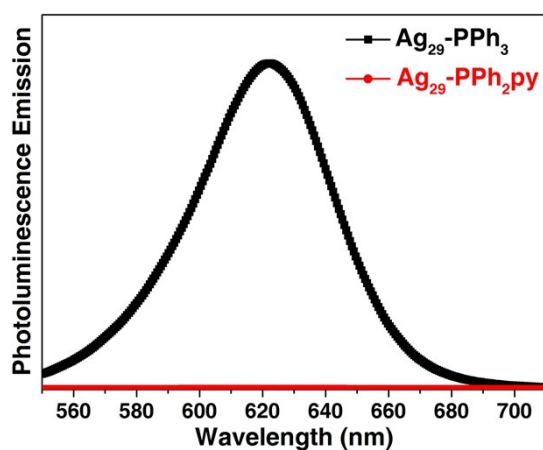

**Fig. S7** Comparison of photoluminescent emissions between  $\text{Ag}_{29}\text{-PPh}_3$  (black line) and  $\text{Ag}_{29}\text{-PPh}_2\text{py}$  (red line) nanoclusters. Nanoclusters were dissolved in  $\text{CH}_2\text{Cl}_2$  with the same OD of 0.1.

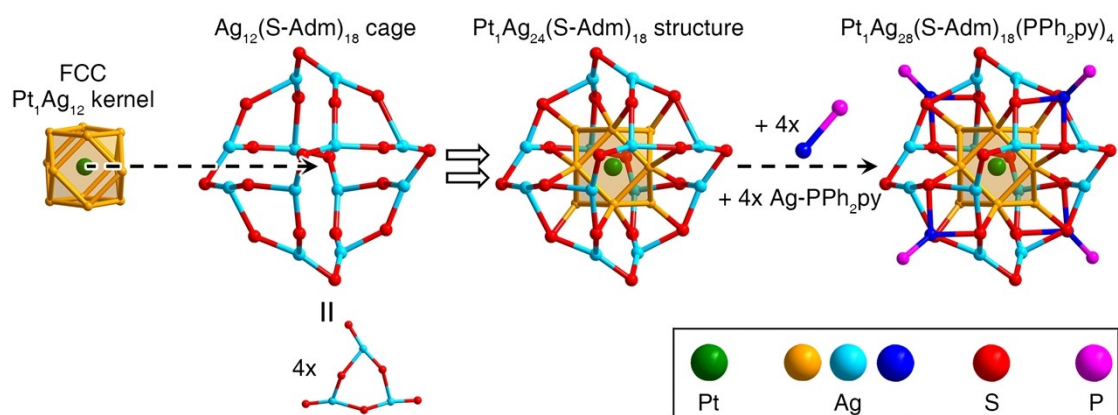

**Fig. S8** Structural anatomy of the  $\text{Pt}_1\text{Ag}_{28}(\text{S-Adm})_{18}(\text{PPh}_2\text{py})_4$  nanocluster. The nanocluster comprised a FCC  $\text{Pt}_1\text{Ag}_{12}$  kernel, an  $\text{Ag}_{12}(\text{S-Adm})_{18}$  cage, and four  $\text{Ag-PPh}_2\text{py}$  vertex units. The overall configuration of  $\text{Pt}_1\text{Ag}_{28}(\text{S-Adm})_{18}(\text{PPh}_2\text{py})_4$  was the same as that of  $\text{Pt}_1\text{Ag}_{28}(\text{S-Adm})_{18}(\text{PPh}_3)_4$ . Color legends: orange/light blue/dark blue sphere, Ag; red sphere, S; magenta sphere, P. For clarity, all C, N, and H atoms are omitted.

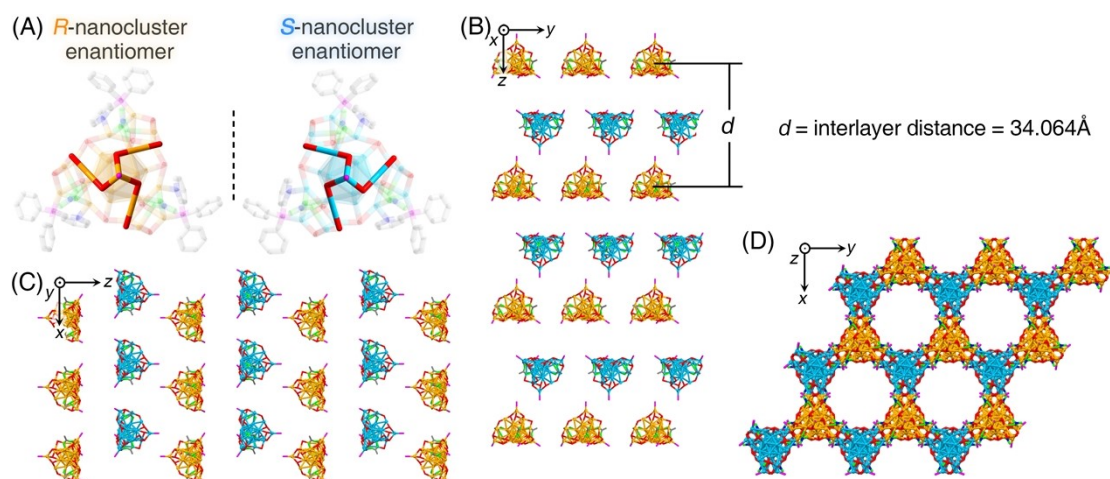

**Fig. S9** (A) Structures of *R*-nanocluster and *S*-nanocluster enantiomers. (B-D) Packing of  $\text{Ag}_{29}\text{-PPh}_2\text{py}$  nanoclusters in the crystal lattice: view from the *x* axis (B), *y* axis (C) and *z* axis (D). As depicted in (B), the interlayer distance was  $34.064 \text{ \AA}$ .

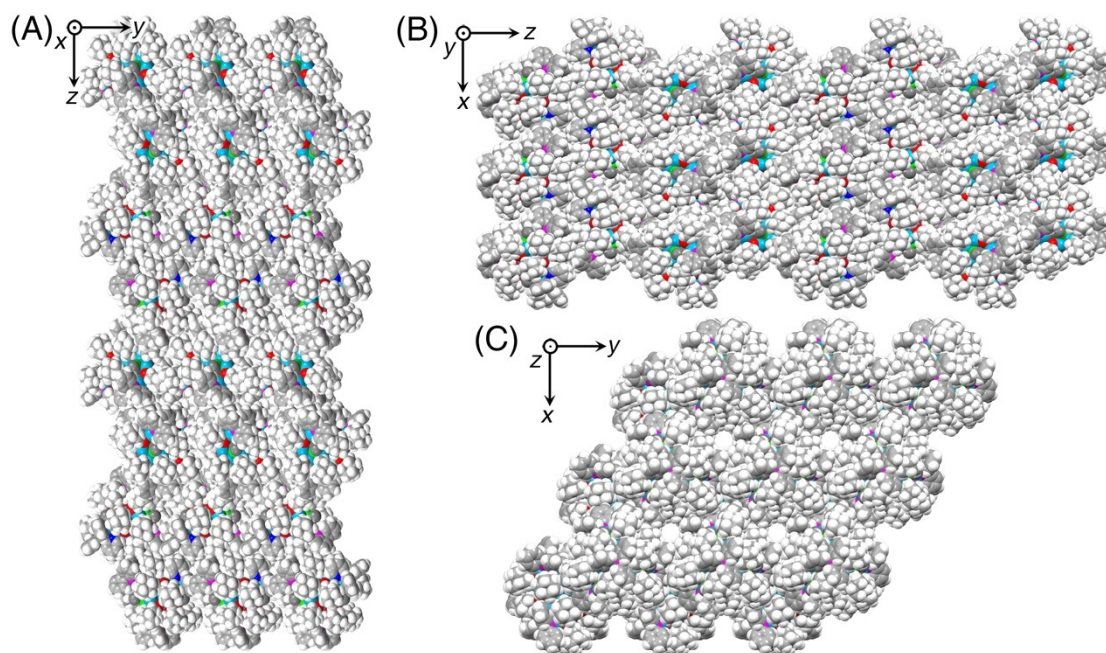

**Fig. S10** Packing of  $\text{Ag}_{29}\text{-PPh}_2\text{py}$  nanoclusters (in a Spacefill mode) in the crystal lattice: view from the x axis (A), y axis (B) and z axis (C).

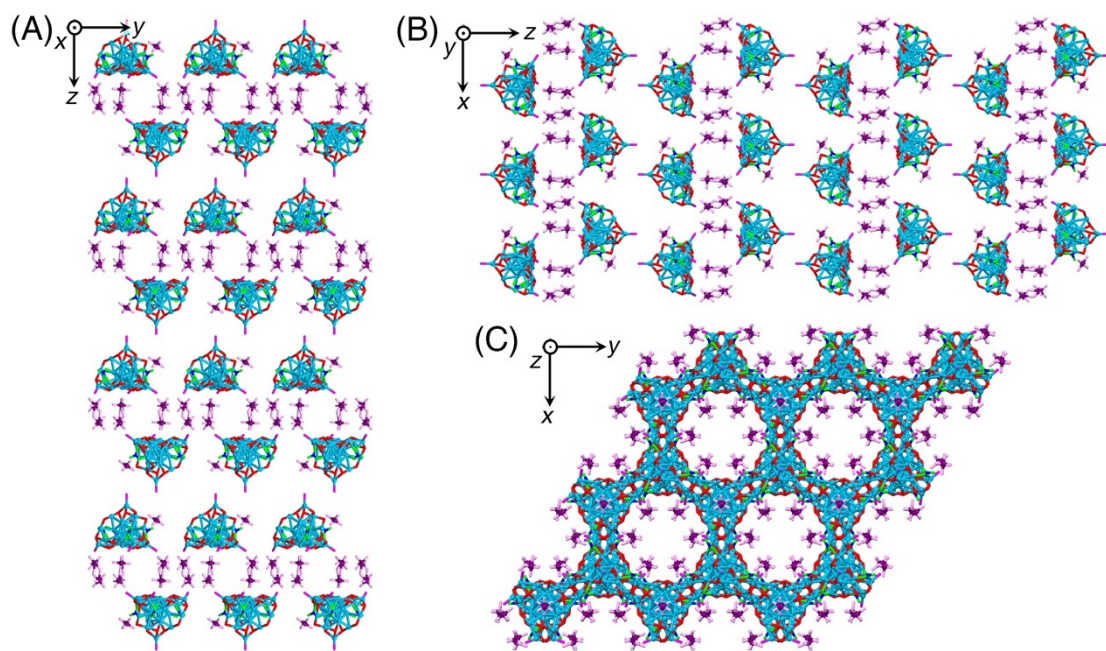

**Fig. S11** Packing of  $\text{Ag}_{29}\text{-PPh}_2\text{py}$  nanoclusters and  $\text{SbF}_6^-$  counterions in the crystal lattice: view from the x axis (A), y axis (B) and z axis (C).

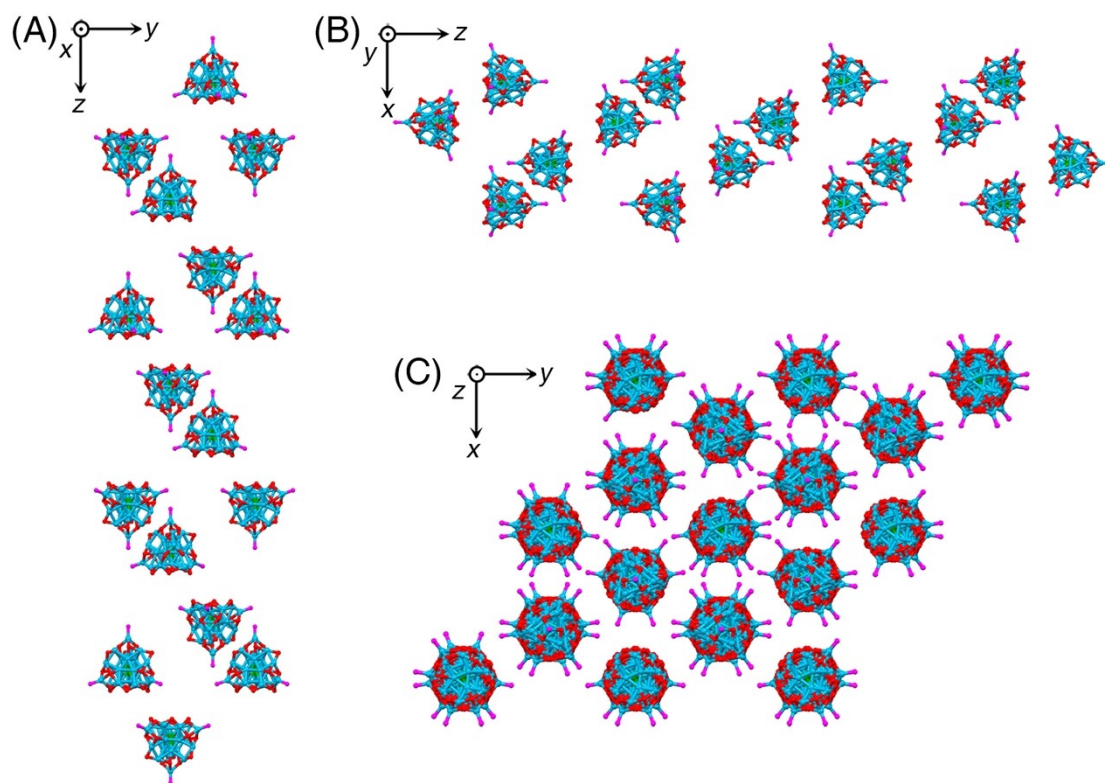

**Fig. S12** Packing of  $\text{Pt}_1\text{Ag}_{28}\text{-PPh}_2\text{py}$  nanoclusters in the crystal lattice: view from the x axis (A), y axis (B) and z axis (C).

**Table S1.** Crystal data and structure refinement for the **Ag<sub>29</sub>-PPh<sub>2</sub>py**.

|                                                       |                                                               |
|-------------------------------------------------------|---------------------------------------------------------------|
| Crystal system                                        | trigonal                                                      |
| Space group                                           | <i>P</i> -3 <i>c</i> 1                                        |
| <i>a</i> /Å                                           | 22.224(4)                                                     |
| <i>b</i> /Å                                           | 22.224(4)                                                     |
| <i>c</i> /Å                                           | 68.128(12)                                                    |
| $\alpha$ /°                                           | 90                                                            |
| $\beta$ /°                                            | 90                                                            |
| $\gamma$ /°                                           | 120                                                           |
| Volume/Å <sup>3</sup>                                 | 29141(12)                                                     |
| <i>Z</i>                                              | 4                                                             |
| $\rho$ <sub>calc</sub> /cm <sup>3</sup>               | 1.701                                                         |
| $\mu$ /mm <sup>-1</sup>                               | 2.307                                                         |
| F(000)                                                | 14534                                                         |
| Radiation                                             | MoK $\alpha$ ( $\lambda$ = 0.71073)                           |
| Index ranges                                          | -28 ≤ <i>h</i> ≤ 28, -28 ≤ <i>k</i> ≤ 28, -78 ≤ <i>l</i> ≤ 84 |
| Final R indexes [ <i>I</i> ≥ 2 $\sigma$ ( <i>I</i> )] | R1 = 0.1337, wR2 = 0.3296                                     |
| Final R indexes [all data]                            | R1 = 0.1651, wR2 = 0.3092                                     |



**Table S2.** Crystal data and structure refinement for the **Pt<sub>1</sub>Ag<sub>28</sub>-PPh<sub>2</sub>py**.

|                                      |                                                                          |
|--------------------------------------|--------------------------------------------------------------------------|
| Crystal system                       | trigonal                                                                 |
| Space group                          | R -3 c                                                                   |
| a/Å                                  | 29.410(8)                                                                |
| b/Å                                  | 29.410(8)                                                                |
| c/Å                                  | 141.76(4)                                                                |
| $\alpha$ /°                          | 90                                                                       |
| $\beta$ /°                           | 90                                                                       |
| $\gamma$ /°                          | 120                                                                      |
| Volume/Å <sup>3</sup>                | 106187(63)                                                               |
| Z                                    | 12                                                                       |
| $\rho$ calcg/cm <sup>3</sup>         | 1.364                                                                    |
| $\mu$ /mm <sup>-1</sup>              | 14.251                                                                   |
| F(000)                               | 42936                                                                    |
| Radiation                            | CuK $\alpha$ ( $\lambda$ = 1.54186)                                      |
| Index ranges                         | -28 $\leq$ h $\leq$ 33, -33 $\leq$ k $\leq$ 13, -151 $\leq$ l $\leq$ 162 |
| Final R indexes [ $I > 2\sigma(I)$ ] | R1 = 0.0764, wR2 = 0.2450                                                |
| Final R indexes [all data]           | R1 = 0.1103, wR2 = 0.2112                                                |
